# Supplementary material for: Graphene nanosheets supporting Ru nanoparticles with controlled nanoarchitectures form a high-performance catalyst for COx-free hydrogen production from ammonia
Source: Royal Society of Chemistry journal article supplement (doi:10.1039/c4ta01193g), 2014-01-01
Supplement: c4ta01193g1.pdf [file c4ta01193g1.pdf]

# Graphene Nanosheets Supporting Ru Nanoparticles with Controlled Nanoarchitectures Form a High-Performance Catalyst for CO<sub>x</sub>-Free Hydrogen Production from Ammonia

Gang Li,<sup>a,b</sup> Hiroki Nagasawa,<sup>b</sup> Masakoto Kanezashi,<sup>b</sup> Tomohisa Yoshioka,<sup>b</sup> and  
Toshinori Tsuru<sup>b\*</sup>

<sup>a</sup>School of Light Industry & Food Science, South China University of Technology,  
No. 381 Wushan Road, Guangzhou, China

<sup>b</sup>Department of Chemical Engineering, Hiroshima University, 1-4-1 Kagamiyama,  
Higashi-Hiroshima, Japan

\*E-mail: [tsuru@hiroshima-u.ac.jp](mailto:tsuru@hiroshima-u.ac.jp)

Tel.: +81 82 424 7714

Fax: +81 82 424 5494

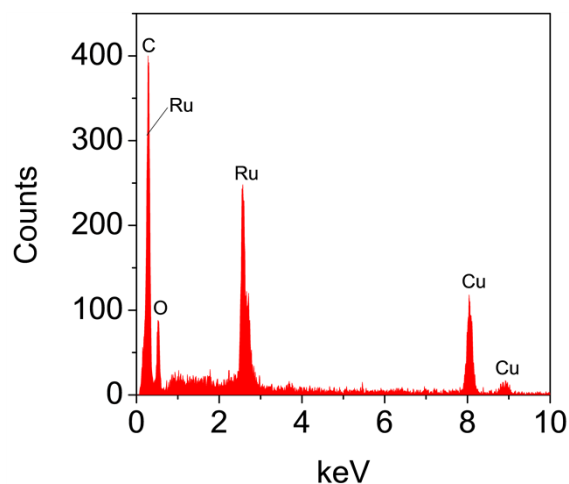

Fig. S1. EDX analysis of CS-Ru/graphene. The Cu element was from the Cu grid used for sample preparation.

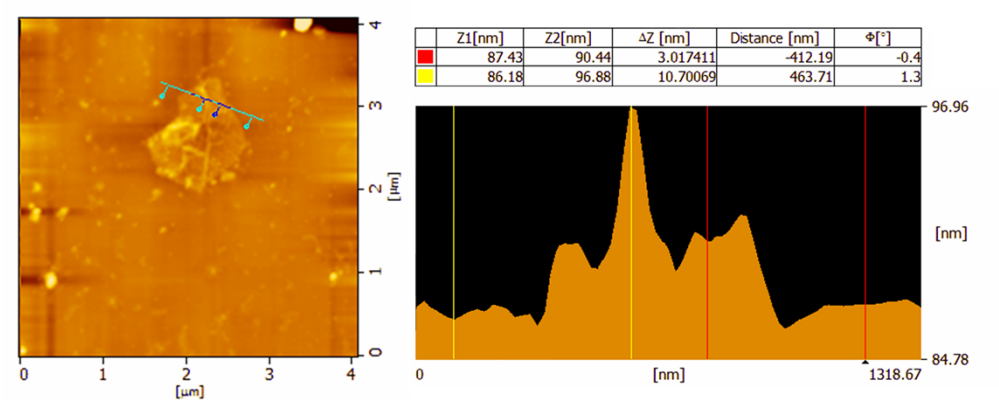

Figure S2. AFM observation of CS-Ru/graphene.

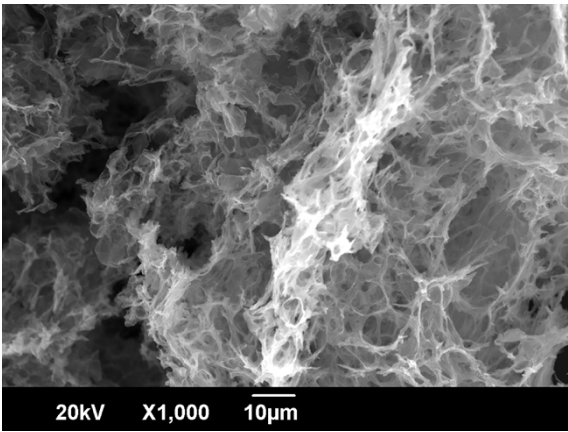

Fig. S3. SEM image of CS-Ru/graphene.

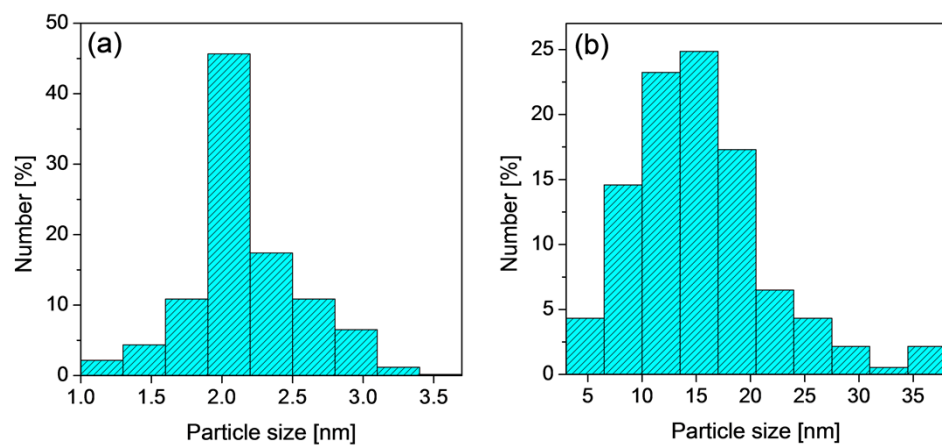

Fig. S4. Ru particle size distributions in the CS-Ru/graphene (a) and SS-Ru/graphene (b).

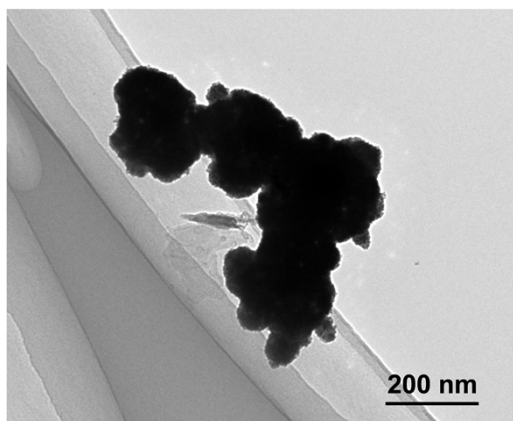

Fig. S5. TEM image of Ru particles prepared in the absence of graphene oxide in the synthesis solution.

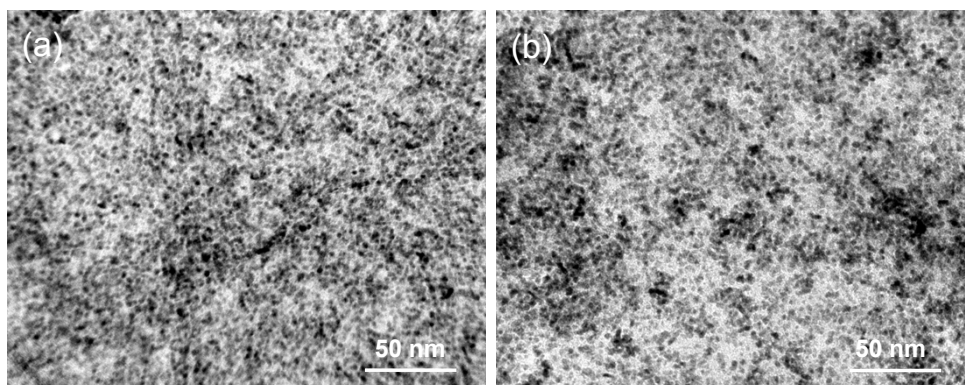

Fig. S6. TEM images of CS-Ru/graphene before (a) and after (b) sonication treatment.
